# Supplementary material for: Visual outcomes and safety profile of intraocular lens implantation versus aphakia in children with microspherophakia with no subluxation
Source: HighWire-hosted journal article supplement (doi:10.1136/bmjophth-2022-001049), 2023-01-01
Supplement: bmjophth-2022-001049supp001_data_supplement.pdf [file bmjophth-2022-001049supp001_data_supplement.pdf]

Supplementary table 1: Rate of complications in group A and group B. CI= Confidence interval, IOL=Intraocular lens

| Complication                 | <b>Group A</b><br><b>12 eyes</b><br><b>6 patients</b> | <b>Group B</b><br><b>10 eyes</b><br><b>7 patients</b> | <b>p-value</b> |
|------------------------------|-------------------------------------------------------|-------------------------------------------------------|----------------|
| Visual axis opacification    | 2 (16.7%), 95% CI 2.9%-49.1%)                         | 0 (0%), 95% CI 0%-34.5%)                              | 0.16           |
| Vitreous haemorrhage         | 0 (0%), 95% CI 0%-30.1%)                              | 1 (10%), 95% CI 0.5%-45.9%)                           | 0.25           |
| Vitreous in anterior chamber | 0 (0%), 95% CI 0%-30.1%)                              | 2 (20%), 95% CI 3.5%-55.8%)                           | 0.08           |
| IOL subluxation              | 1 (8.3%), 95% CI 0.4%-40.2%)                          | 0 (0%), 95% CI 0%-34.5%)                              | 0.34           |
| Total (p-value)              | 3 (25%), 95% CI 6.7%-57.2%)                           | 3 (30%), 95% CI 8.1%-64.6%)                           | 0.82           |
