# Supplementary material for: Visual outcomes and safety profile of intraocular lens implantation versus aphakia in children with microspherophakia with no subluxation
Source: HighWire-hosted journal article supplement (doi:10.1136/bmjophth-2022-001049), 2023-01-01
Supplement: bmjophth-2022-001049supp002_data_supplement.pdf [file bmjophth-2022-001049supp002_data_supplement.pdf]

Supplement Table 2: Review of literature on posterior chamber IOL implantation in eyes with microspherophakia in pediatric age group

| Author<br>Year<br>Type of study         | Objective                                                                                                            | Age<br>(years)<br>/Gender                                               | Follow-up<br>Results                                                                                                                             | Conclusion                                                                                                                                                     |
|-----------------------------------------|----------------------------------------------------------------------------------------------------------------------|-------------------------------------------------------------------------|--------------------------------------------------------------------------------------------------------------------------------------------------|----------------------------------------------------------------------------------------------------------------------------------------------------------------|
| Khokhar et al.<br>2003<br>Case report   | Phacoemulsification in a case of microspherophakia                                                                   | 14 /F                                                                   | 3 months<br>Stable well centred IOL                                                                                                              | Clear lens extraction must be tried in cases of microspherophakia                                                                                              |
| Khokhar et al.<br>2012<br>Case report   | Lens extraction with capsular ring, capsular tension segment insertion with intraocular lens implantation in the bag | 9/M                                                                     | 1 month<br>Stable well centred IOL                                                                                                               | Dual support technique to overcome zonulopathy useful as it supports the bag                                                                                   |
| Al-Haddad et al.<br>2012<br>Case report | Vitrectorhexis and lens aspiration with posterior chamber IOL implantation                                           | 7/M                                                                     | 2 months<br>Well centred IOL, slightly unstable                                                                                                  | Transient movement of the capsular bag may be noted postoperatively, sulcus placement of the IOL is recommended                                                |
| Shreshta et al.<br>2015<br>Case report  | Clear Lens Extraction with foldable IOL implantation                                                                 | 11/ M                                                                   | 3 months<br>Stable well centred IOL                                                                                                              | Improve quality of life in patients with microspherophakia                                                                                                     |
| Farat et al.<br>2019<br>Case report     | Clear lens extraction with IOL implantation                                                                          | 4/M                                                                     | 2 years<br>Stable well centred IOL                                                                                                               | Valid treatment option for high myopia in cases of microspherophakia                                                                                           |
| Liu et al.<br>2020<br>Case report       | Clear lens extraction with IOL implantation in sulcus in a child using analysis of visual quality using iTrace       | 7 /F                                                                    | 1 month<br>Well centred, stable IOL                                                                                                              | iTrace not only plays an important role in analyzing potential reasons of undesirable preoperative visual quality but also can predict postoperative outcomes. |
| Our study<br>Case-control<br>2021       | Clear lens extraction with(Group A)/without in-the-bag IOL (Group B)implantation in children                         | Group A<br>9.4±1.4<br>Group B<br>7.3±0.9<br>(p-value<br>0.18).<br>M=76% | Group A 0.9±0.4<br>years<br>Group B 1.3±0.9<br>years<br>(p-value 0.76)<br>The survival analysis plot for groups A and B p = 0.18, log-rank test. | In-the-bag intra-ocular lens is an favorable option in eyes with microspherophakia with strict pre-operative parameters in developing nations.                 |
